# Supplementary material for: Bridging surface states and current–potential response over hematite-based photoelectrochemical water oxidation
Source: Royal Society of Chemistry journal article supplement (doi:10.1039/c6ra18123f), 2016-01-01
Supplement: c6ra18123f1.pdf [file c6ra18123f1.pdf]

## **Electronic Supplementary Information for**

# **Bridging Surface States and Current-potential Response over Hematite-based Photoelectrochemical Water Oxidation**

Zhiliang Wang,<sup>a,b</sup> Fengtao Fan,<sup>a</sup> Shengyang Wang,<sup>a,b</sup> Chunmei Ding,<sup>a</sup> Yongle Zhao,<sup>a,b</sup> Can Li<sup>a\*</sup>

<sup>a</sup>State Key Laboratory of Catalysis, Dalian Institute of Chemical Physics, Chinese Academy of Sciences, Dalian

National Laboratory for Clean Energy, Dalian, 116023, China

<sup>b</sup>University of Chinese Academy of Sciences, China

### **Corresponding Author**

\*(Can Li). Email: canli@dicp.ac.cn, Tel: 86-411-84379070; Fax: 86-411-84694447; Homepage: [http://](http://www.canli.dicp.ac.cn)

[www.canli.dicp.ac.cn](http://www.canli.dicp.ac.cn)

### **Preparation of hematite photoanode**

The hematite photoanode is prepared by chemical bath as previous reported.<sup>1</sup> Clean FTO (2 cm×2 cm) substrates were vertically placed in a beaker containing 50 mL aqueous solution of  $\text{FeCl}_3 \cdot 9\text{H}_2\text{O}$  (0.1 mol/L, Alfa) and urea (0.15 mol/L, Kermeol). Then it was sealed and maintained in an oven for 3 h at 100 °C. After washing with deionized water completely, we got light yellow  $\text{FeOOH}$  film.

For pure  $\text{Fe}_2\text{O}_3$  electrode, it can be produced by converting the  $\text{FeOOH}$  electrode at 600 °C for 3 hours in air with muffle furnace.

For Ti modified  $\text{Fe}_2\text{O}_3$  electrode, the  $\text{FeOOH}$  electrode should be immersed in 0.1 M TBT ethanol solution for 10 min. Then the electrode was totally washed with ethanol and annealed at 600 °C for 3 hours in air. This electrode is denoted as Ti- $\text{Fe}_2\text{O}_3$ . The procedure of preparing Pt- $\text{Fe}_2\text{O}_3$  is all the same with the Ti- $\text{Fe}_2\text{O}_3$ , except that the 0.1 M TBT is replace with  $\text{H}_2\text{PtCl}_6$  aqueous solution (2 mg Pt/mL).

### **Activating hematite photoanode**

After conversing  $\text{FeOOH}$  into hematite at 600 °C, the electrode was further subjected to a heat treatment in an over at temperature between 100 °C~200 °C. Typically, when temperature reaches the set point, the photoelectrode was put into the oven and kept for 30 min. Once finishing the treatment, it was drawn out directly and cooled down to room temperature naturally.

### **Deposition $\text{Al}_2\text{O}_3$ layer by atom layered deposition**

$\text{Al}_2\text{O}_3$  was deposited on  $\text{Fe}_2\text{O}_3$  photoanode at  $150^\circ\text{C}$  by atom layered deposition (ALD) using trimethylaluminum (TMA) and water as precursors,  $\text{N}_2$  as carrier gas. An ALD cycle of the  $\text{Al}_2\text{O}_3$  deposition included four basic steps: TMA pulse (2 s) and delay (8 s),  $\text{N}_2$  flow purge (20 s) and delay (1 s), water pulse (1 s) and delay (5 s),  $\text{N}_2$  flow purge (20 s) and delay (1 s). And the total  $\text{Al}_2\text{O}_3$  was deposited for two cycles.

#### **$\text{H}_2\text{O}_2$ treatment to the $\text{Ti-Fe}_2\text{O}_3$**

After activating the  $\text{Ti-Fe}_2\text{O}_3$  electrode at  $200^\circ\text{C}$ , it was further treated in commercial  $\text{H}_2\text{O}_2$  (35 %, Kermeol). Typically, a piece of  $\text{Ti-Fe}_2\text{O}_3$  electrode was immersed in 50 mL  $\text{H}_2\text{O}_2$  contained in a beaker and then it was kept at  $100^\circ\text{C}$  for 30 minutes. After this treatment, the electrode was totally washed with deionized water.

#### **(Photo)electrochemical measurement**

All tests were carried out in 1 M NaOH aqueous solution in a 3-electrode system with platinum as counter electrode, saturated calomel electrode (SCE) as the reference electrode, and hematite photoanode as working electrode. A quartz window is used to permit the penetration of simulated AM 1.5 G sunlight generated from the simulator ( $100\text{ mW}/\text{cm}^2$ , Newport Sol 3A, Class AAA Solar simulator).

For the cyclic voltammetry (CV) and linear sweep voltammetry (LSV), they were measured in the range of  $-0.8\text{ V}$ ~ $0.6\text{ V}$  vs SCE at a scan rate of  $50\text{ mV}/\text{s}$  (for LSV) or  $100\text{ mV}/\text{s}$  (for CV) with a potentiostat (CHI 660D, Shanghai Chenhua Instrument Co., Ltd). For the electrochemical impedance spectroscopy, it was measured with a galvanostat/potentiostat (Iviumstat, Ivium

Technologies) in the frequency of  $10^{-1} \sim 10^5$  Hz by applying a 20 mV AC signal at different potential. The data were simulated using equivalent circuit with Zview program.

The potential referred to SCE was transferred to reversible hydrogen electrode (RHE) scale using Nernst equation:

$$E(\text{RHE}) = E(\text{SCE}) + 0.059\text{pH} + 0.2411$$

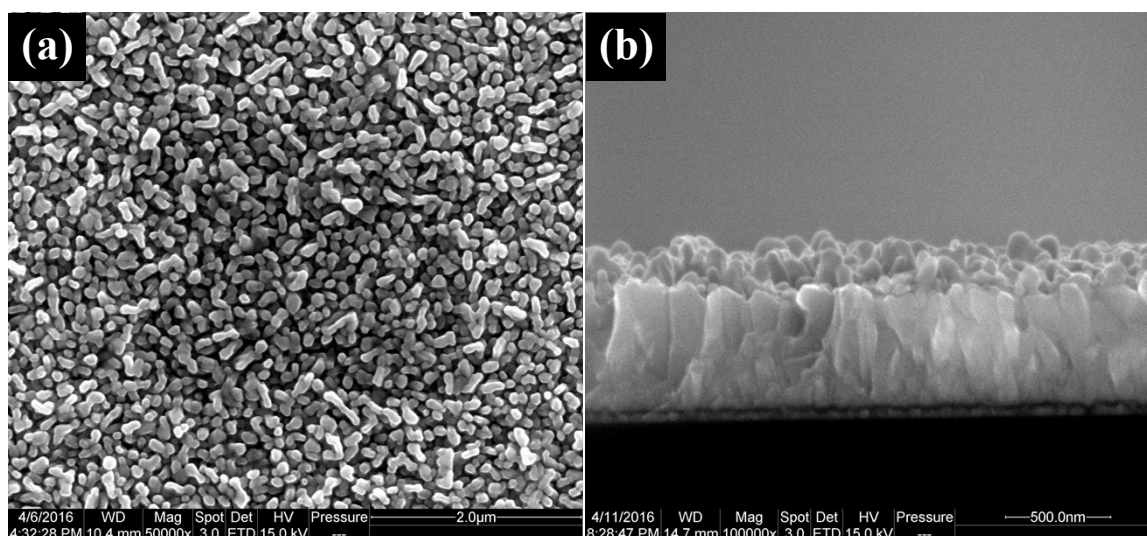

**Figure S1.** The top view (a) and cross-sectional view (b) of  $\text{Fe}_2\text{O}_3$  electrode.

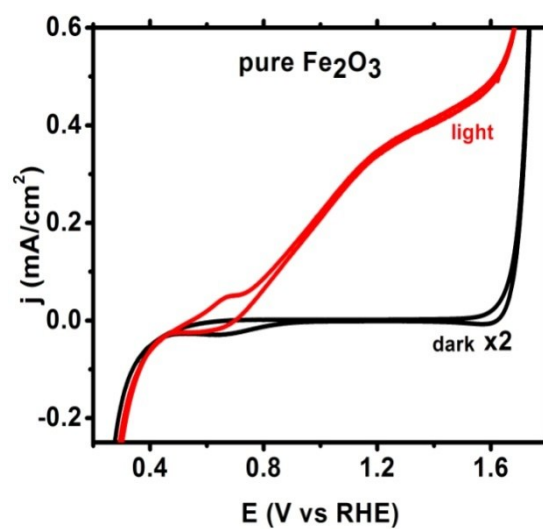

**Figure S2.** The CV of pure  $\text{Fe}_2\text{O}_3$  electrode with (red) and without (black) illumination.

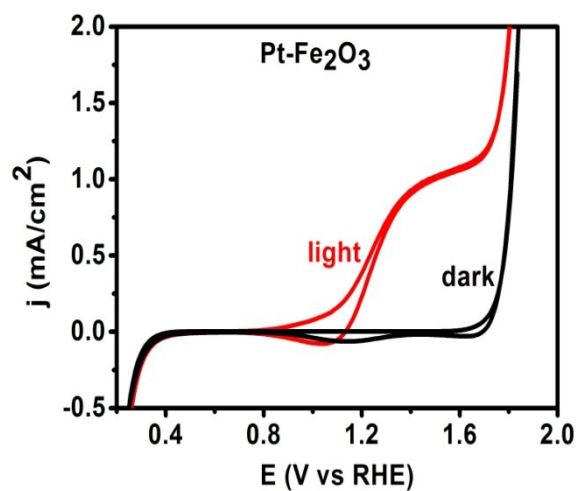

**Figure S3.** The CV of Pt-Fe<sub>2</sub>O<sub>3</sub> electrode with (red) and without (black) illumination.

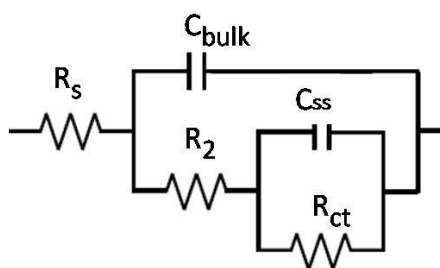

**Figure S4.** The equivalent circuit for simulation.  $C_{ss}$  is the capacitance of surface states;  $C_{bulk}$  is the capacitance of space charge layer;  $R_s$  is the serial resistance;  $R_{ct}$  is the resistance of charge transfer during reaction.

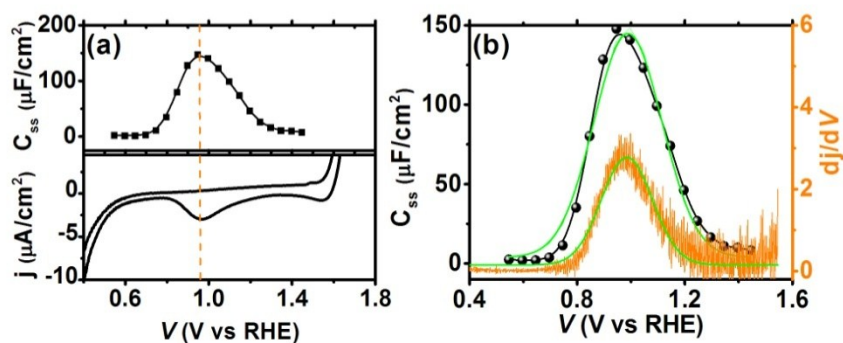

**Figure S5.** The distribution of surface states on Ti-Fe<sub>2</sub>O<sub>3</sub> electrode: (a) comparison between the results from EIS ( $C_{ss}$ ) and CV; (b) comparison between EIS ( $C_{ss}$ ) and differential of current to potential ( $dj/dV$ ). The  $C_{ss}$  and  $dj/dV$  are fitted with Gauss plots.

Indeed, due to a thermal fluctuation, the probability ( $W(E)$ ) we find a surface state at energy level of  $E$  is:<sup>2</sup>

$$W(E) = \frac{1}{\sqrt{4\pi kT\lambda}} \exp[-(E_t - E)^2 / 4\lambda kT] \quad (S1)$$

Where  $\lambda$  is the rearrangement energy of these surface states;  $E_t$  is the centre energy level of surface states. This equation clearly shows a Gauss distribution of surface states in FigureS5.

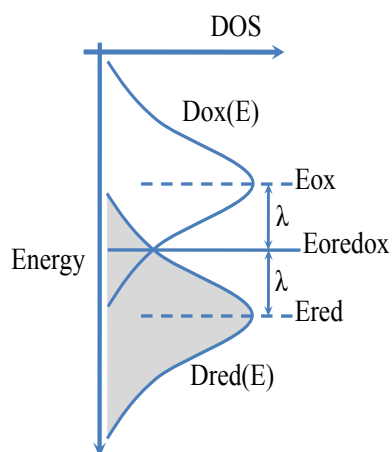

**Figure S6.** The schematic shown of the dispersion density of state for a redox couple due to thermal fluctuation.

## REFERENCES

1. Z. Wang, G. Liu, C. Ding, Z. Chen, F. Zhang, J. Shi and C. Li, *The Journal of Physical Chemistry C*, 2015, **119**, 19607-19612.
2. S. R. Morrison, 1980.
